# Supplementary material for: Evolution and study of a copycat effect in intimate partner homicides: A lesson from Spanish femicides
Source: PubMed Central journal article supplement (PMC6553786; doi:10.1371/journal.pone.0217914), 2019-06-06
Supplement: pone.0217914.s001.pdf [file pone.0217914.s001.pdf]

# PLoS One Supporting Information - S1 Appendix. Dunn's test distribution analysis tables.

**Article title:** Evolution and study of a copycat effect in intimate partner homicides: a lesson from Spanish femicides

**Authors:** José L. Torrecilla, Lara Quijano-Sánchez, Federico Liberatore, Juan J. López-Ossorio, José L. González-Álvarez.

The following Supporting Information is available for this article:

- S1 Table A. Results of Dunn's test of multiple comparisons on years using rank sums.
- S1 Table B. Results of Dunn's test of multiple comparisons on trimesters using rank sums.
- S1 Table C. Results of Dunn's test of multiple comparisons on months using rank sums.
- S1 Table C. Results of Dunn's test of multiple comparisons on day of the week using rank sums.

Table A: Results of Dunn's test of multiple comparisons using rank sums. The columns show: the pair of years considered, the Z statistic and the associated p-value. Significant differences ( $\alpha = 0.05$ ) are identified with an asterisk (\*).

| Years       | Z statistic | Adjusted p-value | Years       | Z statistic | Adjusted p-value |
|-------------|-------------|------------------|-------------|-------------|------------------|
| 2007 - 2008 | -0.01       | 0.49             | 2013 - 2014 | 0.07        | 0.47             |
| 2007 - 2009 | 1.83        | 0.03*            | 2007 - 2015 | 1.35        | 0.09             |
| 2008 - 2009 | 1.85        | 0.03*            | 2008 - 2015 | 1.36        | 0.09             |
| 2007 - 2010 | 0.16        | 0.44             | 2009 - 2015 | -0.49       | 0.31             |
| 2008 - 2010 | 0.17        | 0.43             | 2010 - 2015 | 1.19        | 0.12             |
| 2009 - 2010 | -1.67       | 0.05             | 2011 - 2015 | 0.37        | 0.36             |
| 2007 - 2011 | 0.98        | 0.16             | 2012 - 2015 | -0.46       | 0.32             |
| 2008 - 2011 | 0.99        | 0.16             | 2013 - 2015 | -0.50       | 0.31             |
| 2009 - 2011 | -0.85       | 0.20             | 2014 - 2015 | -0.57       | 0.28             |
| 2010 - 2011 | 0.82        | 0.21             | 2007 - 2016 | 2.44        | 0.01*            |
| 2007 - 2012 | 1.81        | 0.04*            | 2008 - 2016 | 2.45        | 0.01*            |
| 2008 - 2012 | 1.82        | 0.03*            | 2009 - 2016 | 0.60        | 0.27             |
| 2009 - 2012 | -0.03       | 0.49             | 2010 - 2016 | 2.28        | 0.01*            |
| 2010 - 2012 | 1.65        | 0.05             | 2011 - 2016 | 1.45        | 0.07             |
| 2011 - 2012 | 0.82        | 0.20             | 2012 - 2016 | 0.63        | 0.26             |
| 2007 - 2013 | 1.85        | 0.03*            | 2013 - 2016 | 0.59        | 0.28             |
| 2008 - 2013 | 1.86        | 0.03*            | 2014 - 2016 | 0.52        | 0.30             |
| 2009 - 2013 | 0.02        | 0.49             | 2015 - 2016 | 1.09        | 0.14             |
| 2010 - 2013 | 1.69        | 0.05             | 2007 - 2017 | 2.29        | 0.01*            |
| 2011 - 2013 | 0.87        | 0.19             | 2008 - 2017 | 2.30        | 0.01*            |
| 2012 - 2013 | 0.04        | 0.48             | 2009 - 2017 | 0.46        | 0.32             |
| 2007 - 2014 | 1.92        | 0.03*            | 2010 - 2017 | 2.13        | 0.02*            |
| 2008 - 2014 | 1.93        | 0.03*            | 2011 - 2017 | 1.31        | 0.10             |
| 2009 - 2014 | 0.09        | 0.47             | 2012 - 2017 | 0.48        | 0.31             |
| 2010 - 2014 | 1.76        | 0.04*            | 2013 - 2017 | 0.44        | 0.33             |
| 2011 - 2014 | 0.94        | 0.17             | 2014 - 2017 | 0.37        | 0.36             |
| 2012 - 2014 | 0.11        | 0.45             | 2015 - 2017 | 0.94        | 0.17             |
| 2013 - 2014 | 0.07        | 0.47             | 2016 - 2017 | -0.15       | 0.44             |

Table B: Results of Dunn’s test of multiple comparisons using rank sums. The columns show: the pair of trimesters considered, the Z statistic and the associated p-value. Significant differences ( $\alpha = 0.05$ ) are identified with an asterisk (\*).

| Years   | Z statistic | Adjusted p-value |
|---------|-------------|------------------|
| T1 - T2 | 0.45        | 0.33             |
| T1 - T3 | -0.35       | 0.36             |
| T2 - T3 | -0.80       | 0.21             |
| T1 - T4 | -0.06       | 0.48             |
| T2 - T4 | -0.51       | 0.30             |
| T3 - T4 | 0.29        | 0.39             |

Table C: Results of Dunn’s test of multiple comparisons using rank sums. The columns show: the pair of months considered, the Z statistic and the associated p-value. Significant differences ( $\alpha = 0.05$ ) are identified with an asterisk (\*).

| Months  | Z statistic | Adjusted p-value | Months | Z statistic | Adjusted p-value |
|---------|-------------|------------------|--------|-------------|------------------|
| 1 - 10  | 0.03        | 0.49             | 3 - 6  | -0.60       | 0.28             |
| 1 - 11  | 0.06        | 0.48             | 4 - 6  | -0.96       | 0.17             |
| 10 - 11 | 0.03        | 0.49             | 5 - 6  | -0.10       | 0.46             |
| 1 - 12  | 0.59        | 0.28             | 1 - 7  | -0.64       | 0.26             |
| 10 - 12 | 0.56        | 0.29             | 10 - 7 | -0.67       | 0.25             |
| 11 - 12 | 0.52        | 0.30             | 11 - 7 | -0.69       | 0.24             |
| 1 - 2   | -0.00       | 0.50             | 12 - 7 | -1.23       | 0.11             |
| 10 - 2  | -0.04       | 0.49             | 2 - 7  | -0.62       | 0.27             |
| 11 - 2  | -0.06       | 0.47             | 3 - 7  | -1.41       | 0.08             |
| 12 - 2  | -0.58       | 0.28             | 4 - 7  | -1.77       | 0.04             |
| 1 - 3   | 0.77        | 0.22             | 5 - 7  | -0.91       | 0.18             |
| 10 - 3  | 0.74        | 0.23             | 6 - 7  | -0.80       | 0.21             |
| 11 - 3  | 0.71        | 0.24             | 1 - 8  | 0.55        | 0.29             |
| 12 - 3  | 0.19        | 0.43             | 10 - 8 | 0.52        | 0.30             |
| 2 - 3   | 0.76        | 0.22             | 11 - 8 | 0.48        | 0.31             |
| 1 - 4   | 1.13        | 0.13             | 12 - 8 | -0.04       | 0.48             |
| 10 - 4  | 1.10        | 0.14             | 2 - 8  | 0.54        | 0.30             |
| 11 - 4  | 1.06        | 0.14             | 3 - 8  | -0.23       | 0.41             |
| 12 - 4  | 0.55        | 0.29             | 4 - 8  | -0.59       | 0.28             |
| 2 - 4   | 1.11        | 0.13             | 5 - 8  | 0.28        | 0.39             |
| 3 - 4   | 0.37        | 0.36             | 6 - 8  | 0.37        | 0.35             |
| 1 - 5   | 0.27        | 0.39             | 7 - 8  | 1.18        | 0.12             |
| 10 - 5  | 0.24        | 0.41             | 1 - 9  | 0.28        | 0.39             |
| 11 - 5  | 0.21        | 0.42             | 10 - 9 | 0.25        | 0.40             |
| 12 - 5  | -0.32       | 0.38             | 11 - 9 | 0.22        | 0.41             |
| 2 - 5   | 0.27        | 0.39             | 12 - 9 | -0.30       | 0.38             |
| 3 - 5   | -0.50       | 0.31             | 2 - 9  | 0.28        | 0.39             |
| 4 - 5   | -0.86       | 0.19             | 3 - 9  | -0.49       | 0.31             |
| 1 - 6   | 0.17        | 0.43             | 4 - 9  | -0.85       | 0.20             |
| 10 - 6  | 0.14        | 0.44             | 5 - 9  | 0.01        | 0.50             |
| 11 - 6  | 0.11        | 0.46             | 6 - 9  | 0.11        | 0.46             |
| 12 - 6  | -0.41       | 0.34             | 7 - 9  | 0.91        | 0.18             |
| 2 - 6   | 0.17        | 0.43             | 8 - 9  | -0.26       | 0.40             |

Table D: Results of Dunn's test of multiple comparisons using rank sums. The columns show: the pair of days of the week considered, the Z statistic and the associated p-value.

| Days    | Z statistic | Adjusted p-value |
|---------|-------------|------------------|
| Su - Mo | 0.32        | 0.38             |
| Su - Tu | 0.91        | 0.18             |
| Mo - Tu | 0.59        | 0.28             |
| Su - We | 0.99        | 0.16             |
| Mo - We | 0.68        | 0.25             |
| Tu - We | 0.08        | 0.47             |
| Su - Th | 0.54        | 0.29             |
| Mo - Th | 0.22        | 0.41             |
| Tu - Th | -0.37       | 0.36             |
| We - Th | -0.45       | 0.32             |
| Su - Fr | 1.90        | 0.03*            |
| Mo - Fr | 1.58        | 0.06             |
| Tu - Fr | 0.99        | 0.16             |
| We - Fr | 0.90        | 0.18             |
| Th - Fr | 1.36        | 0.09             |
| Su - Sa | 0.09        | 0.46             |
| Mo - Sa | -0.22       | 0.41             |
| Tu - Sa | -0.82       | 0.21             |
| We - Sa | -0.90       | 0.18             |
| Th - Sa | -0.45       | 0.33             |
| Fr - Sa | -1.81       | 0.04*            |
